# Supplementary material
Source: PubMed Central journal article supplement (PMC9297733)
Supplement: NIHMS1791516-supplement-supinfo.pdf [file NIHMS1791516-supplement-supinfo.pdf]

## SEARCH STRATEGY

### Embase

1. 'inflammatory bowel disease':ab,ti OR 'inflammatory bowel diseases':ab,ti OR ibd:ab,ti OR 'crohn disease':ab,ti OR crohn:ab,ti OR 'ulcerative colitis':ab,ti
2. nafld:ab,ti OR nafl:ab,ti OR 'non-alcoholic fatty liver disease':ab,ti OR 'nonalcoholic fatty liver disease':ab,ti OR 'fatty liver disease':ab,ti OR 'fatty liver':ab,ti OR steatosis:ab,ti OR nash:ab,ti OR steatohepatitis:ab,ti
3. #1 AND #2

### PubMed

("inflammatory bowel disease"[Title/Abstract] OR "inflammatory bowel diseases"[Title/Abstract] OR "IBD"[Title/Abstract] OR "Crohn disease"[Title/Abstract] OR "Crohn's disease"[Title/Abstract] OR "ulcerative colitis"[Title/Abstract]) AND ("NAFLD"[Title/Abstract] OR "NAFL"[Title/Abstract] OR "non-alcoholic fatty liver disease"[Title/Abstract] OR "nonalcoholic fatty liver disease"[Title/Abstract] OR "fatty liver disease"[Title/Abstract] OR "fatty liver"[Title/Abstract] OR "steatosis"[Title/Abstract] OR "NASH"[Title/Abstract] OR "steatohepatitis"[Title/Abstract])

### Web of Science

TOPIC: ("inflammatory bowel disease" OR "inflammatory bowel diseases" OR "IBD" OR "Crohn disease" OR "Crohn's disease" OR "ulcerative colitis") AND TOPIC: ("NAFLD" OR "NAFL" OR "non-alcoholic fatty liver disease" OR "nonalcoholic fatty liver disease" OR "fatty liver disease" OR "fatty liver" OR "steatosis" OR "NASH" OR "steatohepatitis")

### Scopus

(( TITLE ("inflammatory bowel disease" OR "inflammatory bowel diseases" OR "IBD" OR "Crohn disease" OR "Crohn's disease" OR "ulcerative colitis" ) OR ABS ("inflammatory bowel disease" OR "inflammatory bowel diseases" OR "IBD" OR "Crohn disease" OR "Crohn's disease" OR "ulcerative colitis" ) ) ) AND ( ( TITLE ( "NAFLD" OR "NAFL" OR "non-alcoholic fatty liver disease" OR

"nonalcoholic fatty liver disease" OR "fatty liver disease" OR "fatty liver" OR "steatosis" OR "NASH" OR "steatohepatitis" ) OR ABS ( "NAFLD" OR "NAFL" OR "non-alcoholic fatty liver disease" OR "nonalcoholic fatty liver disease" OR "fatty liver disease" OR "fatty liver" OR "steatosis" OR "NASH" OR "steatohepatitis" ) ) )

### **ProQuest**

(ti("inflammatory bowel disease" OR "inflammatory bowel diseases" OR "IBD" OR "Crohn disease" OR "Crohn's disease" OR "ulcerative colitis") OR ab("inflammatory bowel disease" OR "inflammatory bowel diseases" OR "IBD" OR "Crohn disease" OR "Crohn's disease" OR "ulcerative colitis")) AND (ti("NAFLD" OR "NAFL" OR "non-alcoholic fatty liver disease" OR "nonalcoholic fatty liver disease" OR "fatty liver disease" OR "fatty liver" OR "steatosis" OR "NASH" OR "steatohepatitis") OR ab("NAFLD" OR "NAFL" OR "non-alcoholic fatty liver disease" OR "nonalcoholic fatty liver disease" OR "fatty liver disease" OR "fatty liver" OR "steatosis" OR "NASH" OR "steatohepatitis"))

**Table 1. Six World Health Organisation (WHO) Regions with member states**

| WHO region                   | Countries                                                                                                                                                                                                                                                                                                                                                                                                                                                                                                                                                                                                    |
|------------------------------|--------------------------------------------------------------------------------------------------------------------------------------------------------------------------------------------------------------------------------------------------------------------------------------------------------------------------------------------------------------------------------------------------------------------------------------------------------------------------------------------------------------------------------------------------------------------------------------------------------------|
| Africa Region                | Algeria, Angola, Benin, Botswana, Burkina Faso, Burundi, Cameroon, Cabo Verde, Central African Republic, Chad, Comoros, Congo, Côte d'Ivoire, Democratic Republic of the Congo, Equatorial Guinea, Eritrea, Ethiopia, Gabon, Gambia, Ghana, Guinea, Guinea-Bissau, Kenya, Lesotho, Liberia, Madagascar, Malawi, Mali, Mauritania, Mauritius, Mozambique, Namibia, Niger, Nigeria, Rwanda, Sao Tome and Principe, Senegal, Seychelles, Sierra Leone, South Africa, South Sudan, Swaziland, Togo, Uganda, United Republic of Tanzania, Zambia, Zimbabwe.                                                       |
| Americas Region              | Antigua and Barbuda, Argentina, Bahamas, Barbados, Belize, Bolivia, Brazil, Canada, Chile, Colombia, Costa Rica, Cuba, Dominica, Dominican Republic, Ecuador, El Salvador, Grenada, Guatemala, Guyana, Haiti, Honduras, Jamaica, Mexico, Nicaragua, Panama, Paraguay, Peru, Saint Kitts and Nevis, Saint Lucia, Saint Vincent and the Grenadines, Suriname, Trinidad and Tobago, United States of America, Uruguay, Venezuela.                                                                                                                                                                               |
| Eastern Mediterranean Region | Afghanistan, Bahrain, Djibouti, Egypt, Iran (Islamic Republic of), Iran, Jordan, Kuwait, Lebanon, Libya, Morocco, Oman, Pakistan, Qatar, Saudi Arabia, Somalia, Sudan, Syrian Arab Republic, Tunisia, United Arab Emirates, Yemen.                                                                                                                                                                                                                                                                                                                                                                           |
| Europe Region                | Albania; Andorra; Armenia; Austria; Azerbaijan; Belarus; Belgium; Bosnia and Herzegovina; Bulgaria; Croatia; Cyprus; Czech Republic; Denmark; Estonia; Finland; France; Georgia; Germany; Greece; Hungary; Iceland; Ireland; Israel; Italy; Kazakhstan; Kyrgyzstan; Latvia; Lithuania, Luxembourg, Malta, Monaco, Montenegro, Netherlands, Norway, Poland, Portugal, Republic of Moldova, Romania, Russian Federation, San Marino, Serbia, Slovakia, Slovenia, Spain, Sweden, Switzerland, Tajikistan, The former Yugoslav Republic of Macedonia, Turkey, Turkmenistan, Ukraine, United Kingdom, Uzbekistan. |

|                        |                                                                                                                                                                                                                                                                                                                                                       |
|------------------------|-------------------------------------------------------------------------------------------------------------------------------------------------------------------------------------------------------------------------------------------------------------------------------------------------------------------------------------------------------|
| South-East Asia Region | Bangladesh, Bhutan, Democratic People's Republic of Korea, India, Indonesia, Maldives, Myanmar, Nepal, Sri Lanka, Thailand, Timor-Leste.                                                                                                                                                                                                              |
| Western Pacific Region | Australia, Brunei Darussalam, Cambodia, China, Cook Islands, Fiji, Japan, Kiribati, Lao People's Democratic Republic, Malaysia, Marshall Islands, Micronesia (Federated States of), Mongolia, Nauru, New Zealand, Niue, Palau, Papua New Guinea, Philippines, Republic of Korea, Samoa, Singapore, Solomon Islands, Tonga, Tuvalu, Vanuatu, Viet Nam. |

**Table 2. Characteristics of the studies included in the systematic review**

| <b>Study</b>                   | <b>Country</b> | <b>Diagnostic method of NAFLD</b> | <b>Disease type</b> | <b>Sample size</b> | <b>Prevalence of NAFLD (%)</b> | <b>Risk of bias score</b> | <b>Risk factors reported for NAFLD with an adjusted odds ratio</b> |
|--------------------------------|----------------|-----------------------------------|---------------------|--------------------|--------------------------------|---------------------------|--------------------------------------------------------------------|
| Almohannadi, 2020 <sup>1</sup> | Qatar          | Imaging                           | IBD                 | 913                | 11.8                           | 5                         | Sex, diabetes                                                      |
|                                |                |                                   | CD                  | 383                | 11.7                           |                           |                                                                    |
|                                |                |                                   | UC                  | 530                | 11.9                           |                           |                                                                    |
| Andrade, 2016 <sup>2</sup>     | Portugal       | Histopathology                    | IBD                 | 54                 | 24.1                           | 5                         | -                                                                  |
| Arias Loste, 2020 <sup>3</sup> | Spain          | Histopathology                    | IBD                 | 795                | 44.0                           | 4                         | -                                                                  |
| Balaban, 2017 <sup>4</sup>     | Romania        | Imaging                           | IBD                 | 62                 | 37.1                           | 3                         | -                                                                  |
| Bargiggia, 2003 <sup>5</sup>   | Italy          | Imaging                           | IBD                 | 511                | 38.0                           | 2                         | -                                                                  |
|                                |                |                                   | CD                  | 311                | 39.5                           |                           |                                                                    |
|                                |                |                                   | UC                  | 200                | 35.5                           |                           |                                                                    |
| Bessissow, 2016 <sup>6</sup>   | Canada         | HSI                               | IBD                 | 321                | 33.6                           | 2                         | -                                                                  |
|                                |                |                                   | CD                  | 217                | 37.3                           |                           |                                                                    |
|                                |                |                                   | UC                  | 104                | 26.0                           |                           |                                                                    |
| Bosch, 2017 <sup>7</sup>       | USA            | Histopathology                    | IBD                 | 93                 | 36.6                           | 3                         | -                                                                  |
|                                |                |                                   | CD                  | 39                 | 61.5                           |                           |                                                                    |
|                                |                |                                   | UC                  | 54                 | 18.5                           |                           |                                                                    |

|                                   |             |                |     |      |      |   |                            |
|-----------------------------------|-------------|----------------|-----|------|------|---|----------------------------|
| Carrillo-Palau, 2021 <sup>8</sup> | Spain       | Imaging        | IBD | 136  | 46.3 | 3 | -                          |
| Chhina, 2014 <sup>9</sup>         | USA         | Imaging        | IBD | 1304 | 9.7  | 5 | -                          |
| Chicco, 2021 <sup>10</sup>        | Italy       | Imaging        | IBD | 142  | 40.8 | 3 | -                          |
|                                   |             |                | CD  | 58   | 46.6 |   |                            |
|                                   |             |                | UC  | 84   | 36.9 |   |                            |
| De Boer, 2008 <sup>11</sup>       | Netherlands | Histopathology | IBD | 83   | 36.1 | 2 | -                          |
| Demir, 2020 <sup>12</sup>         | Turkey      | Imaging        | IBD | 539  | 31.9 | 5 | -                          |
| Di Girolamo, 2013 <sup>13</sup>   | Italy       | Imaging        | IBD | 788  | 16.2 | 4 | -                          |
| Domislovic, 2019 <sup>14</sup>    | Croatia     | HSI            | IBD | 250  | 36.4 | 5 | -                          |
|                                   |             |                | CD  | 167  | 36.5 |   |                            |
|                                   |             |                | UC  | 83   | 36.1 |   |                            |
| Dundulis, 2014 <sup>15</sup>      | USA         | Imaging        | IBD | 70   | 41.4 | 5 | -                          |
| Erzin, 2015 <sup>16</sup>         | Turkey      | Imaging        | IBD | 276  | 36.2 | 5 | -                          |
|                                   |             |                | CD  | 104  | 41.3 |   |                            |
|                                   |             |                | UC  | 172  | 33.1 |   |                            |
| Glassner, 2017 <sup>17</sup>      | USA         | Imaging        | IBD | 421  | 13.3 | 3 | -                          |
| Hoffmann, 2020 <sup>18</sup>      | Germany     | Imaging        | IBD | 455  | 46.8 | 3 | Age, BMI,<br>dyslipidemia, |
|                                   |             |                | CD  | 302  | 48.0 |   |                            |

|                                   |        |         |     |     |      |   |                                                                                               |
|-----------------------------------|--------|---------|-----|-----|------|---|-----------------------------------------------------------------------------------------------|
|                                   |        |         | UC  | 153 | 44.4 |   | hypertension, prior surgery, biologics                                                        |
| Kang, 2020 <sup>19</sup>          | Korea  | Imaging | IBD | 443 | 11.1 | 4 | Sex, age, hypertension, diabetes, prior surgery, immunomodulators, corticosteroids, biologics |
|                                   |        |         | CD  | 274 | 7.3  |   |                                                                                               |
|                                   |        |         | UC  | 169 | 17.2 |   |                                                                                               |
| Kani, 2019 <sup>20</sup>          | Turkey | Imaging | IBD | 99  | 44.4 | 4 | -                                                                                             |
|                                   |        |         | CD  | 58  | 48.3 |   |                                                                                               |
|                                   |        |         | UC  | 39  | 38.5 |   |                                                                                               |
| Lee, 2019 <sup>21</sup>           | USA    | Imaging | IBD | 168 | 28.0 | 5 | -                                                                                             |
| Li, 2017 <sup>22</sup>            | China  | Imaging | IBD | 206 | 10.7 | 4 | -                                                                                             |
|                                   |        |         | CD  | 137 | 10.9 |   |                                                                                               |
|                                   |        |         | UC  | 69  | 10.1 |   |                                                                                               |
| Likhitsup, 2019 (A) <sup>23</sup> | USA    | Imaging | IBD | 70  | 44.3 | 4 | -                                                                                             |
| Likhitsup, 2019 (B) <sup>24</sup> | USA    | Imaging | IBD | 80  | 53.8 | 4 | Sex, BMI                                                                                      |
|                                   |        |         | CD  | 65  | 56.9 |   |                                                                                               |
|                                   |        |         | UC  | 15  | 40.0 |   |                                                                                               |
| Magrì, 2019 <sup>25</sup>         | Italy  | Imaging | IBD | 178 | 40.4 | 3 | -                                                                                             |

|                                 |          |                 |     |     |      |   |                                                                                   |
|---------------------------------|----------|-----------------|-----|-----|------|---|-----------------------------------------------------------------------------------|
|                                 |          |                 | CD  | 83  | 43.4 |   |                                                                                   |
|                                 |          |                 | UC  | 95  | 37.9 |   |                                                                                   |
| Mancina, 2020 <sup>26</sup>     | Italy    | Imaging         | IBD | 95  | 71.6 | 3 | -                                                                                 |
|                                 |          |                 | CD  | 37  | 59.5 |   |                                                                                   |
|                                 |          |                 | UC  | 58  | 79.3 |   |                                                                                   |
| McHenry, 2020 <sup>27</sup>     | USA      | Imaging         | CD  | 311 | 37.9 | 3 | -                                                                                 |
| Mehrotra, 2018 <sup>28</sup>    | India    | Imaging         | UC  | 128 | 18.0 | 3 | -                                                                                 |
| Navaneethan, 2009 <sup>29</sup> | USA      | Imaging         | UC  | 65  | 15.4 | 3 | -                                                                                 |
| Peixoto, 2017 <sup>30</sup>     | Portugal | Imaging         | CD  | 62  | 37.1 | 4 | -                                                                                 |
| Principi, 2018 <sup>31</sup>    | Italy    | Imaging         | IBD | 465 | 28.0 | 2 | -                                                                                 |
|                                 |          |                 | CD  | 258 | 24.4 |   |                                                                                   |
|                                 |          |                 | UC  | 207 | 32.4 |   |                                                                                   |
| Quang Le, 2014 <sup>32</sup>    | USA      | Imaging and HSI | IBD | 232 | 40.9 | 4 | -                                                                                 |
| Restellini, 2017 <sup>33</sup>  | Canada   | Imaging         | IBD | 349 | 39.5 | 3 | Age, BMI,<br>dyslipidemia,<br>hypertension, prior<br>surgery,<br>immunomodulators |



|                                        |         |                           |     |      |      |   |                                                |
|----------------------------------------|---------|---------------------------|-----|------|------|---|------------------------------------------------|
| Ritaccio, 2021 <sup>34</sup>           | USA     | Imaging or histopathology | IBD | 1672 | 12.4 | 2 | -                                              |
|                                        |         |                           | CD  | 897  | 14.6 |   |                                                |
|                                        |         |                           | UC  | 453  | 8.6  |   |                                                |
| Sagami, 2017 <sup>35</sup>             | Japan   | Imaging                   | CD  | 303  | 21.8 | 2 | -                                              |
| Saroli Palumbo, 2019 <sup>36</sup>     | Canada  | Imaging                   | IBD | 384  | 32.8 | 1 | Sex, BMI, diabetes, immunomodulators           |
|                                        |         |                           | CD  | 248  | 31.5 |   |                                                |
|                                        |         |                           | UC  | 136  | 35.3 |   |                                                |
| Schröder, 2015 <sup>37</sup>           | Germany | Imaging                   | IBD | 259  | 28.2 | 4 | -                                              |
|                                        |         |                           | CD  | 170  | 30.0 |   |                                                |
|                                        |         |                           | UC  | 77   | 23.4 |   |                                                |
| Scrivo, 2020 <sup>38</sup>             | Italy   | Imaging and HSI           | IBD | 208  | 20.7 | 3 | -                                              |
| Silva, 2019 <sup>39</sup>              | Brazil  | Imaging                   | IBD | 306  | 6.9  | 5 | -                                              |
|                                        |         |                           | CD  | 141  | 7.1  |   |                                                |
|                                        |         |                           | UC  | 165  | 6.7  |   |                                                |
| Simon, 2018 <sup>40</sup>              | USA     | Imaging                   | CD  | 462  | 52.4 | 0 | Age, diabetes                                  |
| Sourianarayananane, 2013 <sup>41</sup> | USA     | Imaging                   | IBD | 928  | 8.2  | 4 | Hypertension, prior surgery, immunomodulators, |

|                                         |        |         |     |     |      |   |                               |
|-----------------------------------------|--------|---------|-----|-----|------|---|-------------------------------|
|                                         |        |         |     |     |      |   | corticosteroids,<br>biologics |
| Tirath, 2019 <sup>42</sup>              | India  | Imaging | CD  | 100 | 42.0 | 3 | -                             |
| Yamamoto-Furusho,<br>2010 <sup>43</sup> | Mexico | Imaging | IBD | 80  | 11.3 | 4 | -                             |
| Yen, 2021 <sup>44</sup>                 | Taiwan | Imaging | IBD | 81  | 29.6 | 3 | Age, BMI                      |
|                                         |        |         | CD  | 36  | 30.6 |   |                               |
|                                         |        |         | UC  | 45  | 28.9 |   |                               |

**Table 3. Pooled prevalence of non-alcoholic fatty liver disease (NAFLD) in patients with inflammatory bowel disease (IBD) according to different countries**

| <b>Disease type</b> | <b>Country</b> | <b>No. of studies</b> | <b>No. of IBD patients</b> | <b>Pooled prevalence of NAFLD, % (95% CI)</b> | <b>I<sup>2</sup></b> | <b>P-value for <math>\chi^2</math></b> |
|---------------------|----------------|-----------------------|----------------------------|-----------------------------------------------|----------------------|----------------------------------------|
| IBD                 | Brazil         | 1                     | 306                        | 6.9 (4.0-9.7)                                 | NA                   | NA                                     |
|                     | Canada         | 3                     | 1,054                      | 35.3 (31.1-39.4)                              | 51.1%                | 0.129                                  |
|                     | China          | 1                     | 206                        | 10.7 (6.5-14.9)                               | NA                   | NA                                     |
|                     | Croatia        | 1                     | 250                        | 36.4 (30.4-42.4)                              | NA                   | NA                                     |
|                     | Germany        | 2                     | 714                        | 37.6 (19.3-55.8)                              | 96.2%                | <0.001                                 |
|                     | India          | 2                     | 228                        | 29.7 (6.2-53.3)                               | 93.8%                | <0.001                                 |
|                     | Italy          | 7                     | 2,387                      | 36.1 (25.1-47.2)                              | 97.2%                | <0.001                                 |
|                     | Japan          | 1                     | 303                        | 21.8 (17.1-26.4)                              | NA                   | NA                                     |
|                     | Korea          | 1                     | 443                        | 11.1 (8.1-14)                                 | NA                   | NA                                     |
|                     | Mexico         | 1                     | 80                         | 11.3 (4.3-18.2)                               | NA                   | NA                                     |
|                     | Netherlands    | 1                     | 83                         | 36.1 (25.8-46.5)                              | NA                   | NA                                     |
|                     | Portugal       | 2                     | 116                        | 30.4 (17.7-43.2)                              | 57.8%                | 0.124                                  |
|                     | Qatar          | 1                     | 913                        | 11.8 (9.7-13.9)                               | NA                   | NA                                     |
|                     | Romania        | 1                     | 62                         | 37.1 (25.1-49.1)                              | NA                   | NA                                     |
|                     | Spain          | 2                     | 931                        | 44.4 (41.2-47.6)                              | 0.0%                 | 0.619                                  |
|                     | Taiwan         | 1                     | 81                         | 29.6 (19.7-39.6)                              | NA                   | NA                                     |
|                     | Turkey         | 3                     | 914                        | 36.2 (30.2-42.2)                              | 66.6%                | 0.050                                  |
|                     | USA            | 13                    | 5,876                      | 29.6 (22.6-36.5)                              | 98.1%                | <0.001                                 |
|                     | Worldwide      | 44                    | 14,947                     | 30.7 (26.5-34.9)                              | 97.7%                | <0.001                                 |
| CD                  | Brazil         | 1                     | 141                        | 7.1 (2.9-11.3)                                | NA                   | NA                                     |

|    |           |    |       |                  |       |        |
|----|-----------|----|-------|------------------|-------|--------|
|    | Canada    | 2  | 465   | 34.2 (28.5-40.0) | 43.6% | 0.183  |
|    | China     | 1  | 137   | 11.0 (5.7-16.2)  | NA    | NA     |
|    | Croatia   | 1  | 167   | 36.5 (29.2-43.8) | NA    | NA     |
|    | Germany   | 2  | 472   | 39.1 (21.5-56.8) | 93.6% | <0.001 |
|    | India     | 1  | 100   | 42.0 (32.3-51.7) | NA    | NA     |
|    | Italy     | 5  | 747   | 41.3 (30.4-52.2) | 87.9% | <0.001 |
|    | Japan     | 1  | 303   | 21.8 (17.1-26.4) | NA    | NA     |
|    | Korea     | 1  | 274   | 7.3 (4.2-10.4)   | NA    | NA     |
|    | Portugal  | 1  | 62    | 37.1 (25.1-49.1) | NA    | NA     |
|    | Qatar     | 1  | 383   | 11.8 (8.5-15)    | NA    | NA     |
|    | Taiwan    | 1  | 36    | 30.6 (15.5-45.6) | NA    | NA     |
|    | Turkey    | 2  | 162   | 43.8 (36.2-51.4) | 0.0%  | 0.395  |
|    | USA       | 5  | 1,774 | 44.2 (23.9-64.4) | 98.6% | <0.001 |
|    | Worldwide | 25 | 5,223 | 34.4 (28.0-40.8) | 96.9% | <0.001 |
| UC | Brazil    | 1  | 165   | 6.7 (2.9-10.5)   | NA    | NA     |
|    | Canada    | 2  | 240   | 30.7 (21.6-39.9) | 59.5% | 0.116  |
|    | China     | 1  | 69    | 10.1 (3.0-17.3)  | NA    | NA     |
|    | Croatia   | 1  | 83    | 36.1 (25.8-46.5) | NA    | NA     |
|    | Germany   | 2  | 230   | 34.1 (13.4-54.7) | 91.1% | 0.001  |
|    | India     | 1  | 128   | 18.0 (11.3-24.6) | NA    | NA     |
|    | Italy     | 5  | 644   | 44.1 (29.4-58.8) | 93.6% | <0.001 |
|    | Korea     | 1  | 169   | 17.2 (11.5-22.8) | NA    | NA     |
|    | Qatar     | 1  | 530   | 11.9 (9.1-14.6)  | NA    | NA     |

|  |           |    |       |                  |       |        |
|--|-----------|----|-------|------------------|-------|--------|
|  | Taiwan    | 1  | 45    | 28.9 (15.7-42.1) | NA    | NA     |
|  | Turkey    | 2  | 211   | 34.1 (27.7-40.5) | 0.0%  | 0.535  |
|  | USA       | 4  | 587   | 15.8 (7.3-24.3)  | 72.2% | 0.013  |
|  | Worldwide | 22 | 3,101 | 28.2 (22.0-34.3) | 95.1% | <0.001 |

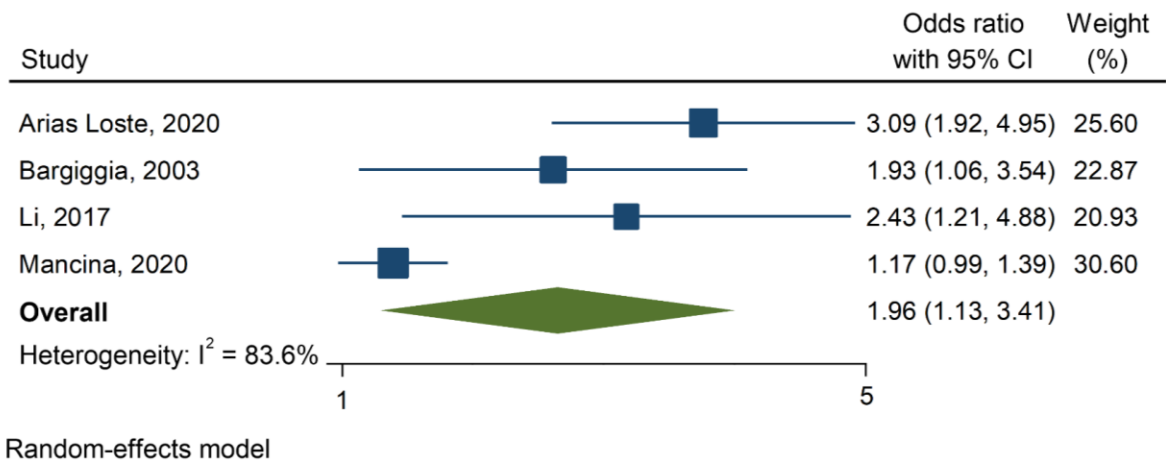

**Figure 1. Forest plot of odds ratio for non-alcoholic fatty liver disease in IBD patients versus healthy controls**

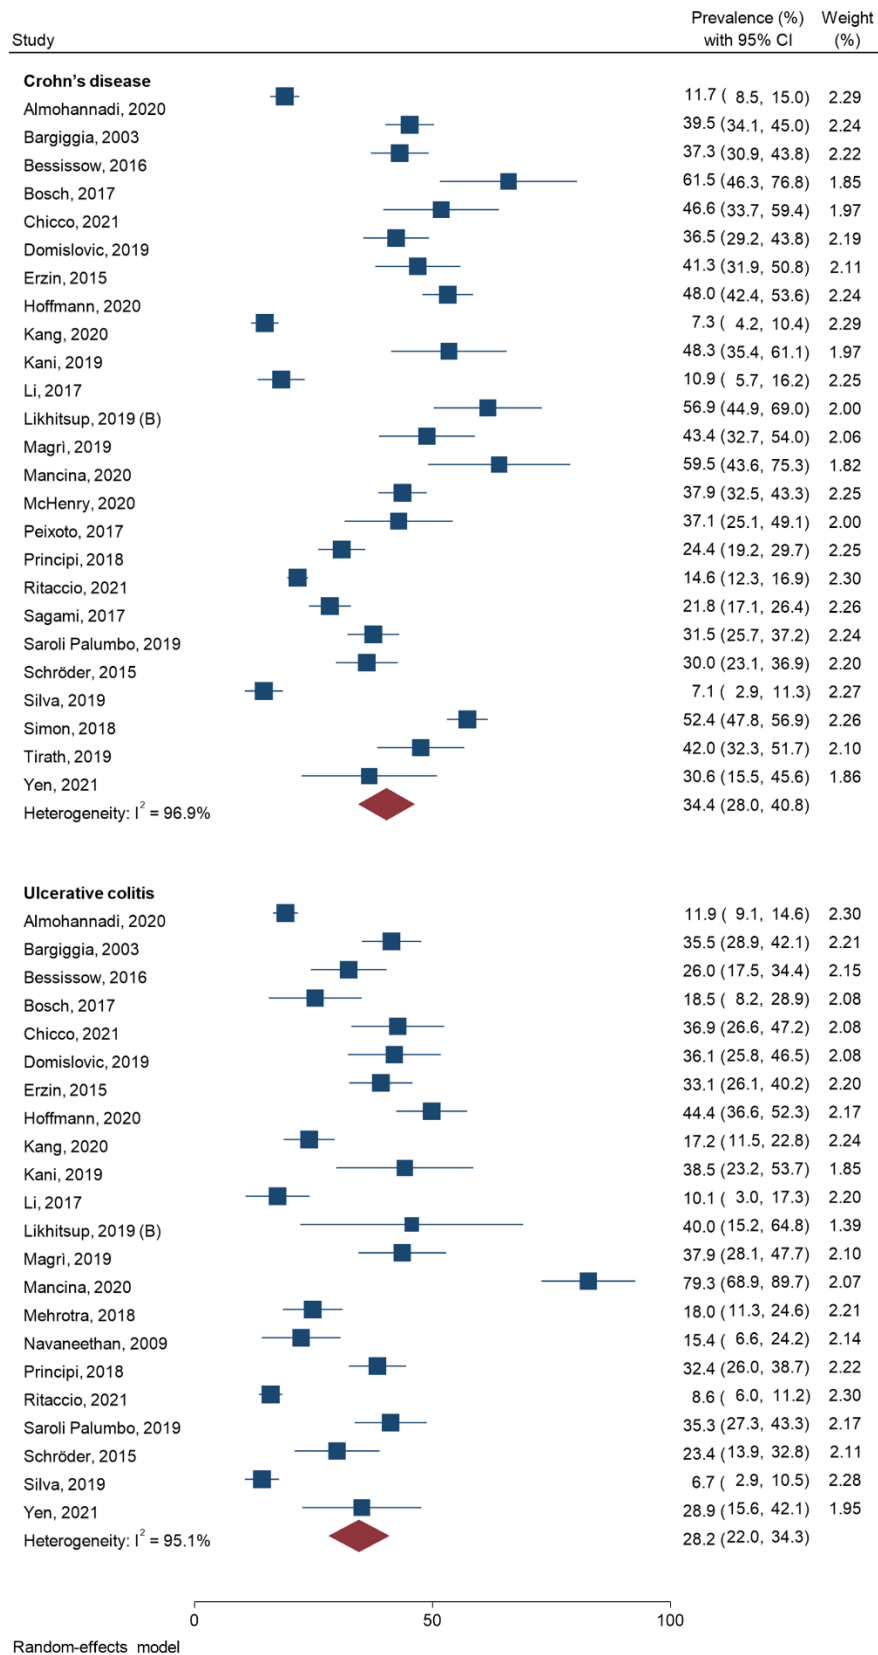

**Figure 2. Forest plot of the pooled prevalence of non-alcoholic fatty liver disease in patients with Crohn's disease and ulcerative colitis**

**Table 4. Definition of IBD remission or activity used in the studies reporting the prevalence of NAFLD according to the disease activity**

| Study          | Definition                                                                  |
|----------------|-----------------------------------------------------------------------------|
| Bessissow 2016 | CD: Harvey Bradshaw Index<br><br>UC: Mayo score                             |
| Hoffmann, 2020 | CD: Harvey Bradshaw Index<br><br>UC: Simple Clinical Colitis Activity Index |
| Magrì, 2019    | CD: Crohn’s disease activity index<br><br>UC: Mayo score                    |
| Principi, 2018 | CD: Harvey Bradshaw Index<br><br>UC: Mayo score                             |
| McHenry, 2020  | CD: Harvey Bradshaw Index                                                   |
| Sagami, 2017   | CD: Crohn’s disease activity index                                          |



## REFERENCES

1. Almohannadi M, Chandra P, Varughese B, Darweesh A, Hamid A, Badi A, et al. Non-alcoholic fatty liver disease among patients with inflammatory bowel disease in Qatar: Prevalence and risk factors. *J Crohns Colitis*. 2020;14(Supplement\_1):S621-S.
2. Andrade P, Lopes S, Lopes J, Macedo G. P0275 A histological appraisal of hepatobiliary disorders in inflammatory bowel disease. *United European Gastroenterol J*. 2016;4:A252.
3. Arias Loste M, García García M, Rodríguez-Duque J, Iruzubieta P, Rivas C, Pascual M, et al. P175 Fatty liver disease as a complication of immune-mediated inflammatory diseases: prevalence and risk factors in inflammatory bowel disease. *J Crohns Colitis*. 2020;14(Supplement\_1):S225-S.
4. Balaban DV, Enache I, Macadon B, Patrascu M, Robu GC, Zoican A, et al. P1670 Prevalence and quantitative assessment of liver steatosis in inflammatory bowel disease patients. *United European Gastroenterol J*. 2017;5:A735.
5. Bargiggia S, Maconi G, Elli M, Molteni P, Ardizzone S, Parente F, et al. Sonographic prevalence of liver steatosis and biliary tract stones in patients with inflammatory bowel disease: study of 511 subjects at a single center. *J Clin Gastroenterol*. 2003;36(5):417-20.
6. Bessissow T, Le NH, Rollet K, Afif W, Bitton A, Sebastiani G. Incidence and predictors of nonalcoholic fatty liver disease by serum biomarkers in patients with inflammatory bowel disease. *Inflamm Bowel Dis*. 2016;22(8):1937-44.
7. Bosch DE, Yeh MM. Primary sclerosing cholangitis is protective against nonalcoholic fatty liver disease in inflammatory bowel disease. *Hum Pathol*. 2017;69:55-62.
8. Carrillo-Palau M, Hernández-Camba A, Hernández Alvarez-Buylla N, Ramos L, Alonso-Abreu I, Hernández-Pérez A, et al. Insulin Resistance Is Not Increased in Inflammatory Bowel Disease Patients but Is Related to Non-Alcoholic Fatty Liver Disease. *J Clin Med*. 2021;10(14):3062.
9. Chhina S, Steadman K, Goel G, Nguyen K, Targan S, Li X, et al. Small Bowel Location, Stricturing Behavior, Vitamin D Receptor Polymorphism, and Metabolic Disease Susceptibility Genes Are Associated With NAFLD in Crohn's Disease. *Am J Gastroenterol*. 2014;109:S504.
10. Chicco F, Magri S, Cingolani A, Paduano D, Pesenti M, Zara F, et al. Multidimensional impact of Mediterranean diet on IBD patients. *Inflamm Bowel Dis*. 2021;27(1):1-9.

11. De Boer NK, Tuynman H, Bloemena E, Westerga J, Van Der Peet DL, Mulder CJ, et al. Histopathology of liver biopsies from a thiopurine-naive inflammatory bowel disease cohort: prevalence of nodular regenerative hyperplasia. *Scand J Gastroenterol.* 2008;43(5):604-8.
12. Demir M. P783 Non-alcoholic fatty liver disease and advanced liver disease in patients with inflammatory bowel disease: prevalence and risk factors. *J Crohns Colitis.* 2020;14(Supplement\_1):S619-S20.
13. Di Girolamo M, Scancelli A, Bertani A, Sartini A, Merighi A, Villa E. P615 Ultrasonographic prevalence of liver steatosis in patients with inflammatory bowel disease in a single center. *J Crohns Colitis.* 2013(7):S258.
14. Domislovic V, Stromar IK, Premuzic M, Bender DV, Matasin M, Milinkovic A, et al. Retrospective study on incidence rates of NAFLD and advanced liver fibrosis in Crohn's disease and ulcerative colitis. *J Crohns Colitis.* 2019;13(Supplement\_1):S496-S.
15. Dundulis J, Helzberg J, Ansari S, El-Halawany H, Michelson R, Chhabra R. NAFLD Appears to Be the Most Common Liver Disease in IBD Patients; IBD is Likely a Risk Factor for NAFLD. *Am J Gastroenterol.* 2014;109:S147.
16. Erzin Y, Demir N, Cabuk C, Kantarci F, Hatemi I, Celik A. P565 The increased prevalence of non-alcoholic fatty liver disease in inflammatory bowel disease patients is not related to inflammatory load. *J Crohns Colitis.* 2015;9(suppl\_1):S363-S.
17. Glassner K, Malaty HM, Abraham BP. Epidemiology and risk factors of nonalcoholic fatty liver disease among patients with inflammatory bowel disease. *Inflamm Bowel Dis.* 2017;23(6):998-1003.
18. Hoffmann P, Jung V, Behnisch R, Gauss A. Prevalence and risk factors of nonalcoholic fatty liver disease in patients with inflammatory bowel diseases: A cross-sectional and longitudinal analysis. *World J Gastroenterol.* 2020;26(46):7367-81.
19. Kang MK, Kim KO, Kim MC, Park JG, Jang BI. Sarcopenia is a new risk factor of nonalcoholic fatty liver disease in patients with inflammatory bowel disease. *Dig Dis.* 2020;38(6):507-14.
20. Kani HT, Deliktas İ, Yilmaz Y. Prevalence of fatty liver disease in patients with inflammatory bowel disease: a transient elastography study on the basis of a controlled attenuation parameter. *Marmara Med J.* 2019;32(2):68-70.
21. Lee A, Shah V, Nandi N. Sa1629 – The Risk Factors and Prevalence of Non-Alcoholic Fatty Liver Disease in Inflammatory Bowel Disease. *Gastroenterology.* 2019;156(6):S-1260-S-1.

22. Li D, Lu C, Yu C. High incidence of non-alcoholic fatty liver disease in patients with Crohn's disease but not ulcerative colitis. *Int J Clin Exp Pathol*. 2017;10(10):10633–9.
23. Likhitsup A, Dundulis J, Ansari S, El-Halawany H, Michelson R, Hutton C, et al. Prevalence of non-alcoholic fatty liver disease on computed tomography in patients with inflammatory bowel disease visiting an emergency department. *Ann Gastroenterol*. 2019;32(3):283-6.
24. Likhitsup A, Dundulis J, Ansari S, Patibandla S, Hutton C, Kennedy K, et al. High prevalence of non-alcoholic fatty liver disease in patients with inflammatory bowel disease receiving anti-tumor necrosis factor therapy. *Ann Gastroenterol*. 2019;32(5):463–8.
25. Magrì S, Paduano D, Chicco F, Cingolani A, Farris C, Delogu G, et al. Nonalcoholic fatty liver disease in patients with inflammatory bowel disease: beyond the natural history. *World J Gastroenterol*. 2019;25(37):5676–86.
26. Mancina RM, De Bonis D, Pagnotta R, Cosco C, Cosco V, Montalcini T, et al. Ulcerative colitis as an independent risk factor for hepatic steatosis. *Gastroenterol Nurs*. 2020;43(4):292-7.
27. McHenry S, Tirath A, Tsai R, Sharma Y, Flores AG, Davidson NO, et al. Derivation and internal validation of a clinical prediction tool to predict nonalcoholic fatty liver disease in patients with Crohn's disease. *Inflamm Bowel Dis*. 2020;26(12):1917-25.
28. Mehrotra P, Mehrotra P. Non-alcoholic fatty liver disease in patients with Ulcerative colitis: a prospective Indian data. *Hepatol Int*. 2018;12(Suppl 2):S455.
29. Navaneethan U, Remzi FH, Nutter B, Fazio VW, Shen B. Risk factors for abnormal liver function tests in patients with ileal pouch-anal anastomosis for underlying inflammatory bowel disease. *Am J Gastroenterol*. 2009;104(10):2467-75.
30. Peixoto A, Silva M, Morais R, Liberal R, Gonçalves R, Lopes S, et al. P417 Non-invasive assessment of liver fibrosis by transient elastography and AST to ALT ratio in patients with Crohn's disease treated with methotrexate. *J Crohns Colitis*. 2017;11(suppl\_1):S289.
31. Principi M, Iannone A, Losurdo G, Mangia M, Shahini E, Albano F, et al. Nonalcoholic fatty liver disease in inflammatory bowel disease: prevalence and risk factors. *Inflamm Bowel Dis*. 2018;24(7):1589-96.
32. Quang Le NH, Rollet KC, Afif W, Bitton A, Bessissow T, Sebastiani G. Mo1245 impact of inflammatory bowel disease activity on the incidence of non-alcoholic fatty liver disease: a 7-year longitudinal study. *Gastroenterology*. 2014;5(146):S-596.

33. Restellini S, Palumbo CS, Chao C-y, Aruljothy A, Sebastiani G, Bessissow T. Screening for non-alcoholic fatty liver disease by transient elastography with controlled attenuation parameter in unselected patients with inflammatory bowel disease. *Gastroenterology*. 2017;152(5):S976.
34. Ritaccio G, Stoleru G, Abutaleb A, Cross RK, Shetty K, Sakiani S, et al. Nonalcoholic Fatty Liver Disease Is Common in IBD Patients However Progression to Hepatic Fibrosis by Noninvasive Markers Is Rare. *Dig Dis Sci*. 2021;66(9):3186-91.
35. Sagami S, Ueno Y, Tanaka S, Fujita A, Hayashi R, Oka S, et al. Significance of non-alcoholic fatty liver disease in Crohn's disease: A retrospective cohort study. *Hepatol Res*. 2017;47(9):872-81.
36. Saroli Palumbo C, Restellini S, Chao C-Y, Aruljothy A, Lemieux C, Wild G, et al. Screening for nonalcoholic fatty liver disease in inflammatory bowel diseases: a cohort study using transient elastography. *Inflamm Bowel Dis*. 2019;25(1):124-33.
37. Schröder T, Schmidt KJ, Olsen V, Möller S, Mackenroth T, Sina C, et al. Liver steatosis is a risk factor for hepatotoxicity in patients with inflammatory bowel disease under immunosuppressive treatment. *Eur J Gastroenterol Hepatol*. 2015;27(6):698-704.
38. Scrivo B, Celsa C, Busacca A, Giuffrida E, Pipitone R, Grimaudo S, et al. P162 Prevalence of nafld (non alcoholic fatty liver disease) and fibrosis in inflammatory bowel disease: the impact of traditional risk factors, intestinal inflammation and genetic phenotype. *J Crohns Colitis*. 2020;14(Supplement\_1):S219-S20.
39. Silva J, Brito BS, Silva INdN, Nóbrega VG, da Silva MCS, Gomes HDdN, et al. Frequency of hepatobiliary manifestations and concomitant liver disease in inflammatory bowel disease patients. *Biomed Res Int*. 2019;2019:7604939.
40. Simon TG, Van Der Sloot KW, Chin SB, Joshi AD, Lochhead P, Ananthakrishnan AN, et al. IRGM gene variants modify the relationship between visceral adipose tissue and NAFLD in patients with Crohn's disease. *Inflamm Bowel Dis*. 2018;24(10):2247-57.
41. Sourianarayanan A, Garg G, Smith TH, Butt MI, McCullough AJ, Shen B. Risk factors of non-alcoholic fatty liver disease in patients with inflammatory bowel disease. *J Crohns Colitis*. 2013;7(8):e279-e85.
42. Tirath A, McHenry S, Ganesh G, Ciorba MA, Sharma M, Banerjee R, et al. 783 Nonalcoholic Fatty Liver Disease in a South Asian Crohn's Disease Population: External Validation of the St. Louis Steatosis Index. *Am J Gastroenterol*. 2019;114:S453-S4.

43. Yamamoto-Furusho JK, Sánchez-Osorio M, Uribe M. Prevalence and factors associated with the presence of abnormal function liver tests in patients with ulcerative colitis. *Ann Hepatol.* 2010;9(4):397-401.
44. Yen H-H, Su P-Y, Huang S-P, Wu L, Hsu T-C, Zeng Y-H, et al. Evaluation of non-alcoholic fatty liver disease in patients with inflammatory bowel disease using controlled attenuation parameter technology: A Taiwanese retrospective cohort study. *PLoS One.* 2021;16(5):e0252286.
